# Supplementary material
Source: PubMed Central journal article supplement (PMC3351329)
Supplement: supp_M112.358978_jbc.M112.358978-1.pdf [file supp_M112.358978_jbc.M112.358978-1.pdf]

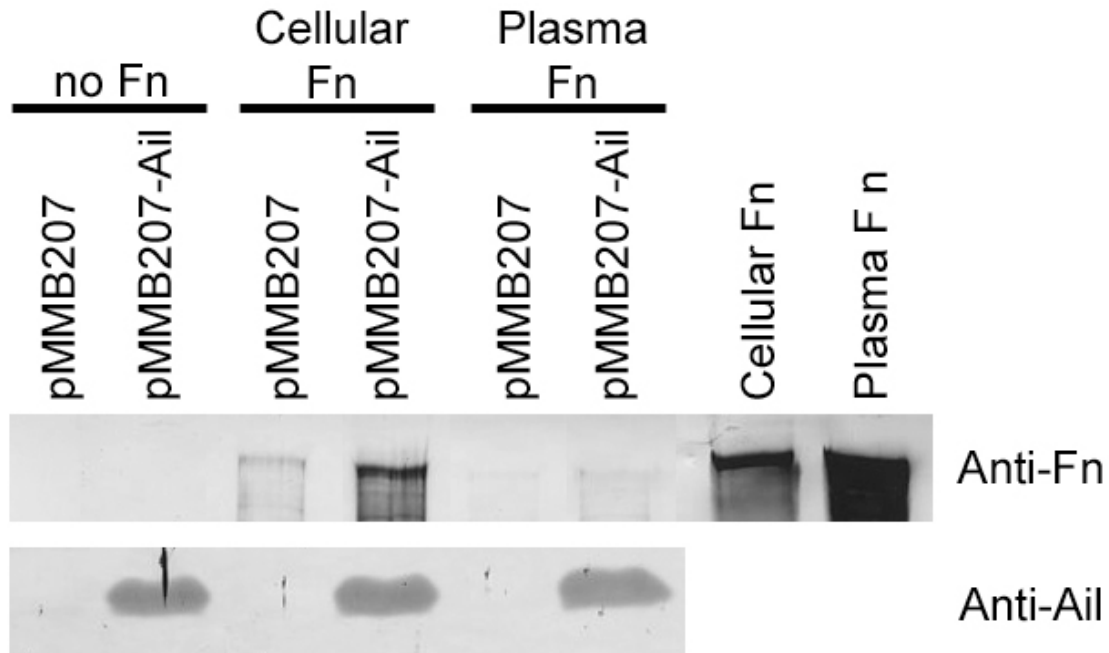

**Figure S1: Ail binds cellular Fn in solution much more efficiently than plasma Fn.**  $3.6 \times 10^7$  cells of *E. coli* strain AAEC185 expressing empty vector (pMMB207) or Ail, were grown overnight at 28°C with 100µM IPTG, washed and pelleted bacteria were resuspended with 20µg/ml cellular or plasma Fn in 200µl PBS + 0.4% BSA solution at 37°C for 1 h with rolling. Bacteria were pelleted to pull down bound Fn for 5 min at 13K rpm in a microcentrifuge. Bacteria were washed once with 1ml PBS and respun prior to boiling in SDS sample buffer and loading on a 7.5% SDS-PAGE gel (for anti-Fn) and 15% SDS-PAGE for anti-Ail). Fn at 10µg/ml was also run on the gel as a control for total Fn available for binding. Western blotting with an anti-Fn polyclonal antibody (1:1000) or anti-Ail polyclonal antibody (1:500) followed by goat anti-rabbit-AP conjugated 2° antibody allowed detection of bacterial-bound Fn and Ail expressed in *E. coli*, respectively.

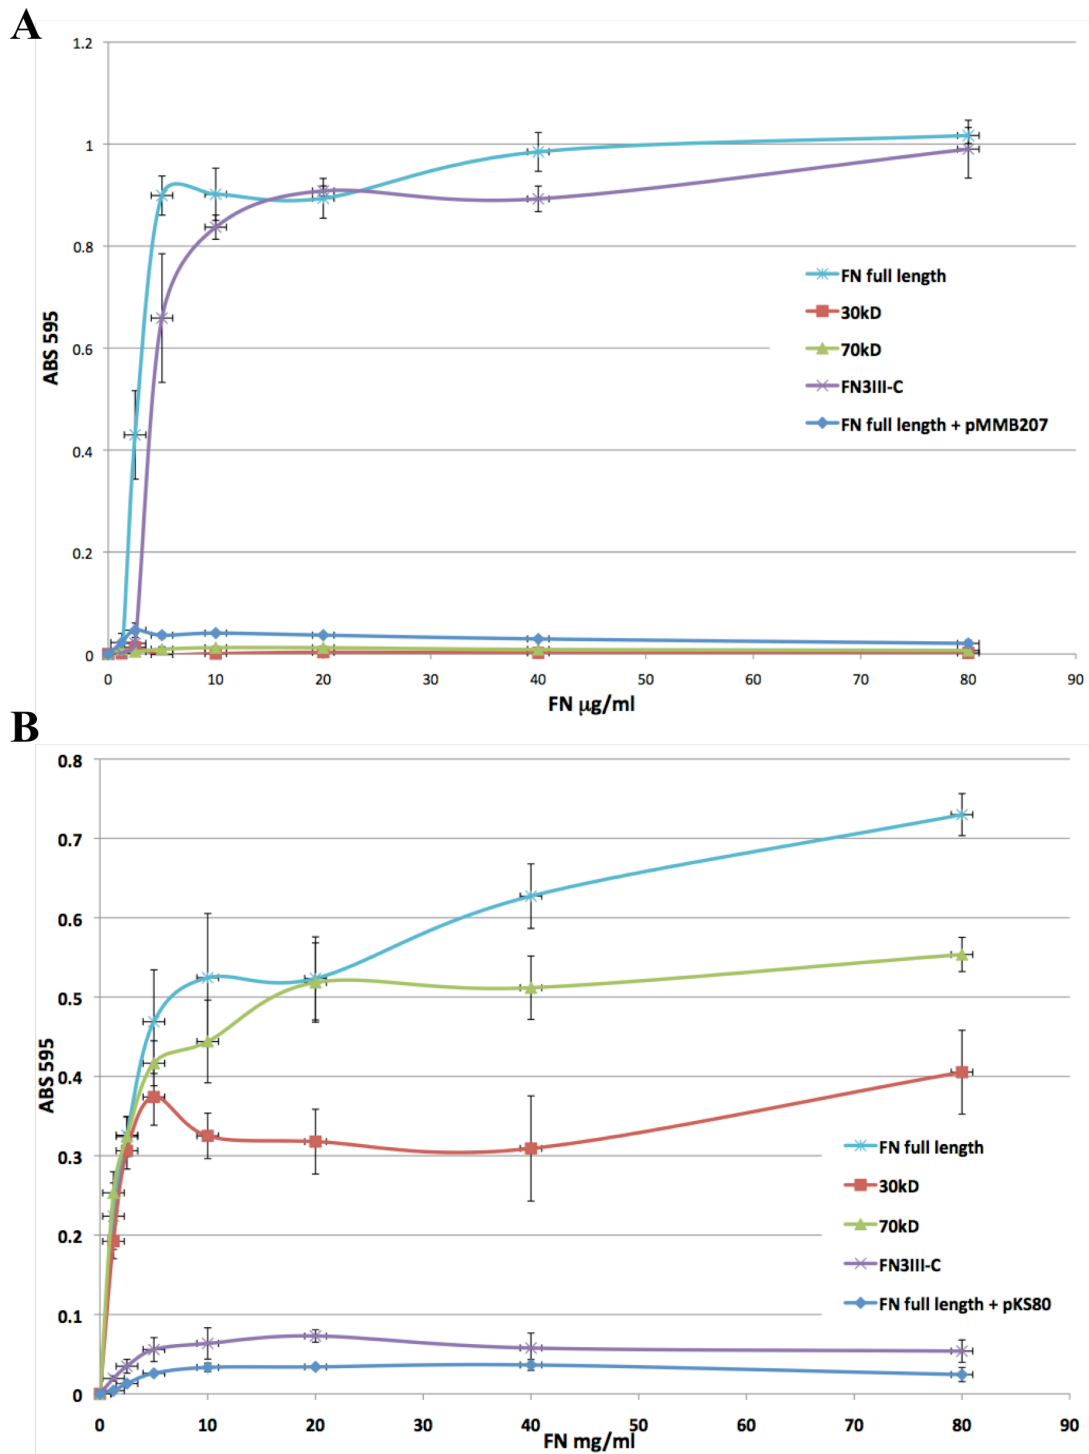

**Fig. S2: Ail and FnBP bind FN fragments in a dose-dependent manner.** *E. coli* expressing Ail or containing empty vector (pMMB207) were allowed to bind to increasing concentrations of full length plasma FN or various proteolytic or recombinant fragments of FN immobilized on 96-well microtiter plates (A). *L. lactis* expressing *Staphylococcus aureus* FnBP or empty vector (pKS80) were allowed to bind to the same increasing concentrations of full length FN or fragments (B).

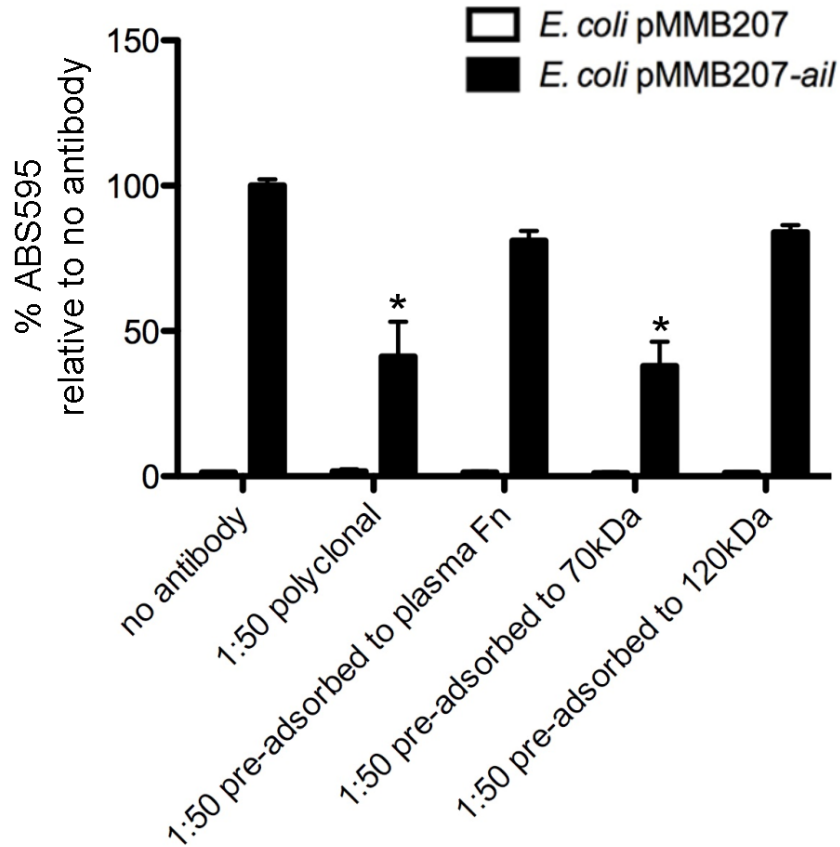

**Figure S3: Polyclonal anti-Fn antibody pre-adsorbed to the 120-kDa fragment can no longer inhibit Ail binding.** Microtiter wells were coated with plasma Fn (10 $\mu$ g/ml). The polyclonal antibody and pre-adsorbed antibodies were added at a 1:50 dilution for 1 h at 37°C prior to addition of *E. coli* AAEC185 derivatives expressing empty vector and Ail. Bacteria were allowed to bind for an additional 1 h at 37°C. Bound bacteria were stained with 0.01% crystal violet, washed and the cells were solubilized and read at A<sub>595</sub>. Shown are the results of three experiments in triplicate. \* p<0.0005.

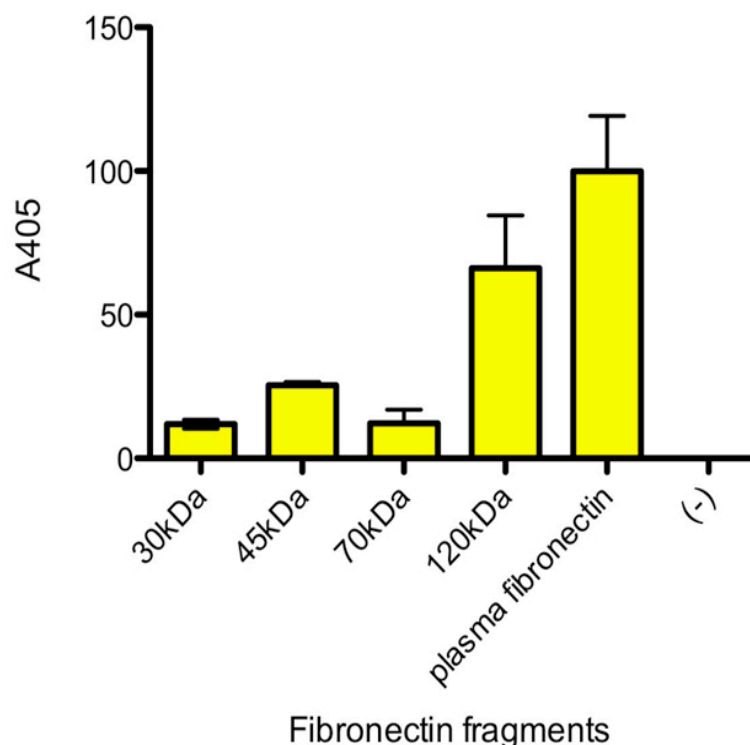

**Figure S4: Polyclonal anti-Fn antibody recognizes epitopes throughout Fn.** To examine the epitopes recognized by the polyclonal antibody, we performed a modified ELISA assay. Plasma Fn and fibronectin fragments were coated onto microtiter wells and the polyclonal anti-Fn antibody was added. The polyclonal antibody recognized full-length plasma Fn and this signal was normalized to 100%. The polyclonal antibody recognized the 120-kDa fragment, although the signal was less than full length Fn, as expected. The 30-kDa, 45-kDa, and 70-kDa fragments were also recognized but to a lower level. This might be expected, as these Fn fragments are shorter than the 120-kDa or full-length Fn derivatives. Without any Fn coated onto well, the polyclonal antibody gave no signal.

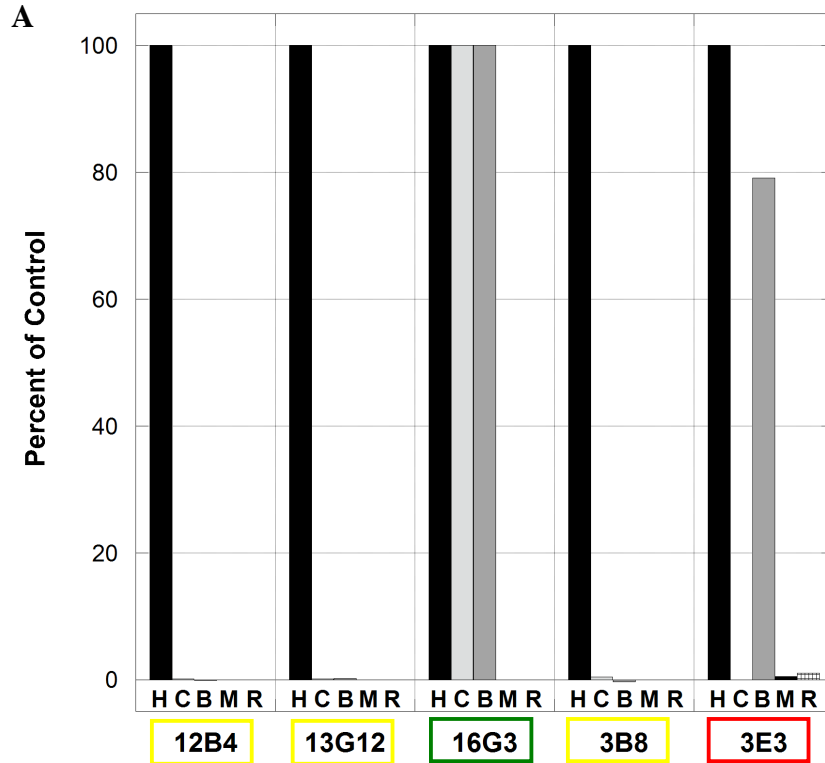

**B**

| <sup>9</sup> FNIII |            |            |            |            |                    |                    |                    |            |            |      |
|--------------------|------------|------------|------------|------------|--------------------|--------------------|--------------------|------------|------------|------|
|                    | 1448       |            |            |            |                    |                    |                    |            |            | 1537 |
| <b>Hu</b>          | GLDSPTGIDF | SDITANSFTV | HWIAPRATIT | GYRIRHHPEN | <b>FS</b> GRPREDRV | <b>PH</b> SRNSITLT | <b>NI</b> LPGTEYVV | SIVALNGREE | SPLLIGQQST |      |
| <b>Bo</b>          | ALDSPSGIDF | SDITANSFTV | HWIAPRATIT | GYRIRHHPEN | MGGRPREDRV         | PPSRNSITLT         | NLNPGEYVV          | SIVALNSKEE | SLPLVQQST  |      |
| <b>Rat</b>         | GLDSPTGFDS | SDVTANSFTV | HWVAPRAPIT | GYIIRHHAEH | SAGRPRQDRV         | PPSRNSITLT         | NLNPGEYIV          | TIIAVNGREE | SPPLIGQQST |      |
| <b>Ch</b>          | GLDSPTGLDF | SDITANSFTV | HWIAPRATIT | GYKIRHHPEN | GVGRPKEDRV         | PPSRNSITLT         | NLLPGTEYVV         | SIIAVNGREE | SVPLVQQST  |      |
| <b>Mu</b>          | GLDSPTGFDS | SDITANSFTV | HWVAPRAPIT | GYIIRHHAEH | SVGRPRQDRV         | PPSRNSITLT         | NLNPGEYVV          | SIIAVNGREE | SPPLIGQQAT |      |

  

| <sup>10</sup> FNIII |            |                      |                              |            |            |                    |                             |                    |            |      |
|---------------------|------------|----------------------|------------------------------|------------|------------|--------------------|-----------------------------|--------------------|------------|------|
|                     | 1538       |                      |                              |            |            |                    |                             |                    |            | 1631 |
| <b>Hu</b>           | VSDVPRDLEV | <b>VA</b> ATPTSLLI   | <b>SW</b> DAPAVT <b>TV</b> R | YYRITYGETG | GNSPVQEFTV | PGSKSTATI <b>S</b> | <b>GL</b> KPG <b>V</b> DYTI | <b>TV</b> YAVTGRGD | SPASSKPISI | NYRT |
| <b>Bo</b>           | VSDVPRDLEV | <b>IA</b> ATPTSLLI   | <b>SW</b> DAPAVT <b>TV</b> R | YYRITYGETG | GSSPVQEFTV | PGSKSTATI <b>S</b> | <b>GL</b> KPG <b>V</b> DYTI | <b>TV</b> YAVTGRGD | SPASSKPVSI | NYRT |
| <b>Rat</b>          | VSDVPRDLEV | I <b>AS</b> TPTSLLI  | <b>SW</b> EPPAVS <b>V</b> R  | YYRITYGETG | GNSPVQEFTV | PGSKSTATIN         | <b>NI</b> KPGADYTI          | <b>TL</b> YAVTGRGD | SPASSKPVSI | NYQT |
| <b>Ch</b>           | VSDVPRDLEV | NPT <b>S</b> PTSLLEI | <b>SW</b> DAPAVT <b>TV</b> R | YYRITYGETG | GSSPVQEFTV | PGTMSRATIT         | <b>GL</b> KPG <b>V</b> DYTI | <b>TV</b> YAVTGRGD | SPASSKPVTV | TYKT |
| <b>Mu</b>           | VSDIPRDLEV | I <b>AS</b> TPTSLLI  | <b>SW</b> EPPAVS <b>V</b> R  | YYRITYGETG | GNSPVQEFTV | PGSKSTATIN         | <b>NI</b> KPGADYTI          | <b>TL</b> YAVTGRGD | SPASSKPVSI | NYKT |

**Figure S5: Reactivity of various anti-Fn monoclonal antibodies with a variety of Fn molecules from different species.** mAbs were allowed to bind mouse, human, bovine, rat or chicken Fn immobilized on microtiter plates. Binding of each antibody was then revealed using anti-mouse or anti-rat secondary antibodies conjugated to alkaline phosphatase. Reactivity to human Fn was set to 100% for normalization (A). To adjust for variation in antigen coating between species, each mAb was further normalized to a species-specific positive control. Potential binding sites based on reactivity are highlighted in yellow for antibodies 12B4, 13G12 and 3B8 in <sup>9</sup>FNIII, green for antibody 16G3 in <sup>10</sup>FNIII and red for 3E3 in <sup>10</sup>FNIII (B). While V1609 is a potential recognition residue for mAb 16G3 in <sup>10</sup>FNIII, it is not exposed on the surface, based on the crystal structure of Fn (1). Hu=human Bo=bovine, Ch=chicken and Mu=murine.

**Table S1: Strains and plasmids used in this study**

| Strains                   | Features                                                                                                                                                                          | Source               |
|---------------------------|-----------------------------------------------------------------------------------------------------------------------------------------------------------------------------------|----------------------|
| <i>E. coli</i>            |                                                                                                                                                                                   |                      |
| AAEC185                   | <i>supE44 hsdR17 mcrA mcrB endA1 thi-1 ΔfimB-fimH ΔrecA</i>                                                                                                                       | (2)                  |
| Rosetta(DE3)pLysS         | F <sup>-</sup> <i>ompT hsdS<sub>B</sub>(R<sub>B</sub><sup>-</sup> m<sub>B</sub><sup>-</sup>) gal dcm λ(DE3 [lacI lacUV5-T7 gene1 ind1 sam7 nin5]) pLysSRARE (Cam<sup>R</sup>)</i> | Lab strain (Novagen) |
| <i>Y. pestis</i>          |                                                                                                                                                                                   |                      |
| KIM5 D27                  | <i>Δpgm, pCD1<sup>+</sup>, pPCP1<sup>+</sup>, pMT1<sup>+</sup></i>                                                                                                                | (3)                  |
| KIM5 D27 <i>Δpla</i>      | <i>Δpgm Δpla pCD1<sup>+</sup> pPCP1<sup>+</sup> pMT1<sup>+</sup></i>                                                                                                              | this study           |
| KIM5 D27 <i>Δail Δpla</i> | <i>Δpgm Δail Δpla pCD1<sup>+</sup>, pPCP1<sup>+</sup>, pMT1<sup>+</sup></i>                                                                                                       | this study           |
| <i>L. lactis</i>          |                                                                                                                                                                                   |                      |
| SP18                      | wild-type non-adherent <i>L. lactis</i> MG1363 + pKS80                                                                                                                            | (4)                  |
| SP9                       | MG1363 + pRM9 (pFnBP)                                                                                                                                                             | (4)                  |
| <b>Plasmids</b>           |                                                                                                                                                                                   |                      |
| pMMMB207                  | Cm-resistant expression plasmid                                                                                                                                                   | (5)                  |
| pMMMB207- <i>ail</i>      | <i>ail</i> -expressing plasmid                                                                                                                                                    | (6)                  |
| pKS80                     | Erythromycin-resistant expression plasmid                                                                                                                                         | (4)                  |
| pFnBP                     | pRM9, FnBPA-expressing plasmid                                                                                                                                                    | (4)                  |
| pET30b+TEV                | pET30b+ His-tagging vector with a TEV protease site replacing the enterokinase cleavage site                                                                                      | this study           |

**References for Supplemental Materials:**

## References

1. Leahy, D. J., Aukhil, I., and Erickson, H. P. (1996) *Cell* **84**, 155-164
2. Blomfield, I. C., McClain, M. S., and Eisenstein, B. I. (1991) *Mol Microbiol* **5**, 1439-1445
3. Marketon, M. M., DePaolo, R. W., DeBord, K. L., Jabri, B., and Schneewind, O. (2005) *Science* **309**, 1739-1741
4. Massey, R. C., Kantzanou, M. N., Fowler, T., Day, N. P., Schofield, K., Wann, E. R., Berendt, A. R., Hook, M., and Peacock, S. J. (2001) *Cell Microbiol* **3**, 839-851
5. Morales, V. M., Backman, A., and Bagdasarian, M. (1991) *Gene* **97**, 39-47
6. Felek, S., and Krukoni, E. S. (2009) *Infect Immun* **77**, 825-836
